# Supplementary material for: Nitration of β-Lactoglobulin but Not of Ovomucoid Enhances Anaphylactic Responses in Food Allergic Mice
Source: PubMed Central journal article supplement (PMC4425501; doi:10.1371/journal.pone.0126279), 2015-05-08
Supplement: pone.0126279.s005.pdf [file pone.0126279.s005.pdf]

**S2 Table. Cytokine levels of splenocytes stimulated with untreated OVM**

| <b>Group</b> | <b>IL-4</b>         | <b>IFN-<math>\gamma</math></b> | <b>IL-10</b>          |
|--------------|---------------------|--------------------------------|-----------------------|
| 1            | 38.908 $\pm$ 13.568 | 143.550 $\pm$ 78.223           | 176.920 $\pm$ 65.532  |
| 2            | 31.420 $\pm$ 18.048 | 118.389 $\pm$ 118.389          | 63.317 $\pm$ 30.811   |
| 3            | 42.297 $\pm$ 9.020  | 110.511 $\pm$ 32.973           | 171.833 $\pm$ 45.956  |
| 4            | 4.643 $\pm$ 4.643   | 0                              | 0                     |
| 5            | 0                   | 0                              | 0                     |
| 6            | 0                   | 0                              | 120.556 $\pm$ 120.556 |

Results are presented as mean values  $\pm$  SEM. OVM, ovomucoid
